# Supplementary material
Source: Springer Nature journal article supplement (https://www.springermedizin.de/resource/supplementary/12885_2013_3971_MOESM1_ESM.pdf/9464934)

**A**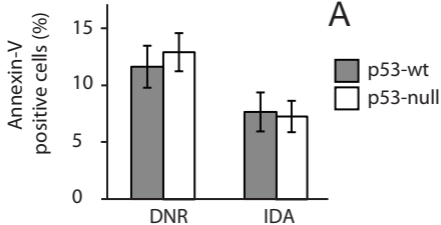**B**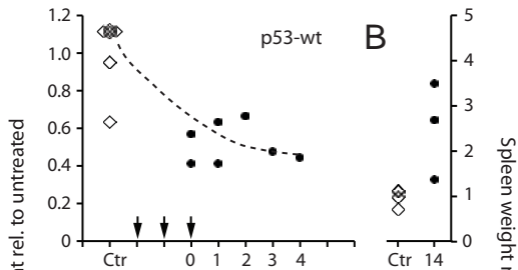**C**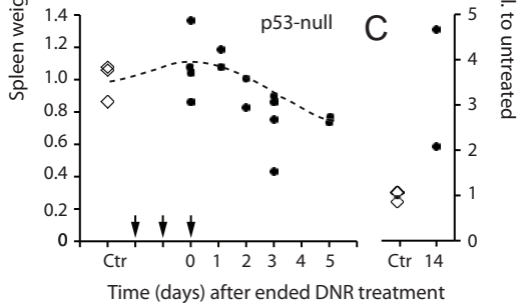

Supplement: MOESM1 [file 9464934]
